# Supplementary material
Source: HighWire-hosted journal article supplement (https://bmjopen.bmj.com/content/8/3/e020157)
Supplement: inline-supplementary-material-1 [file inline-supplementary-material-1.pdf]

**Additional Tables**

Table A1. Physical strains by occupation.

|                                                               | Always |      | Often |      | Sometimes |      | Rarely |      | Never /<br>hardly ever |      |
|---------------------------------------------------------------|--------|------|-------|------|-----------|------|--------|------|------------------------|------|
|                                                               | n      | %    | n     | %    | n         | %    | n      | %    | n                      | %    |
| <b>Noise (n=252)</b>                                          |        |      |       |      |           |      |        |      |                        |      |
| Technicians                                                   | 22     | 17.6 | 55    | 44.0 | 43        | 34.4 | 4      | 3.2  | 1                      | 0.8  |
| Other                                                         | 13     | 10.2 | 50    | 39.4 | 44        | 34.6 | 17     | 13.4 | 3                      | 2.4  |
| <b>Vibrations/oscillation (n=255)</b>                         |        |      |       |      |           |      |        |      |                        |      |
| Technicians                                                   | 21     | 16.7 | 54    | 42.9 | 32        | 25.4 | 16     | 12.7 | 3                      | 2.4  |
| Other                                                         | 18     | 14.0 | 40    | 31.0 | 37        | 28.7 | 21     | 16.3 | 13                     | 10.1 |
| <b>Humidity/moisture (n=254)</b>                              |        |      |       |      |           |      |        |      |                        |      |
| Technicians                                                   | 3      | 2.4  | 49    | 38.9 | 60        | 47.6 | 12     | 9.5  | 2                      | 1.6  |
| Other                                                         | 3      | 2.3  | 35    | 27.3 | 59        | 46.1 | 24     | 18.8 | 7                      | 5.5  |
| <b>Cold (n=254)</b>                                           |        |      |       |      |           |      |        |      |                        |      |
| Technicians                                                   | 1      | 0.8  | 41    | 32.5 | 75        | 59.5 | 8      | 6.3  | 1                      | 0.8  |
| Other                                                         | 2      | 1.6  | 32    | 25.0 | 70        | 54.7 | 17     | 13.3 | 7                      | 5.5  |
| <b>Heat (n=254)</b>                                           |        |      |       |      |           |      |        |      |                        |      |
| Technicians                                                   | 2      | 1.6  | 36    | 28.8 | 73        | 58.4 | 13     | 10.4 | 1                      | 0.8  |
| Other                                                         | 1      | 0.8  | 19    | 14.7 | 80        | 62.0 | 24     | 18.6 | 5                      | 3.9  |
| <b>Frequent changes between heat and cold (n=252)</b>         |        |      |       |      |           |      |        |      |                        |      |
| Technicians                                                   | 5      | 4.0  | 24    | 19.4 | 51        | 41.1 | 37     | 29.8 | 7                      | 5.6  |
| Other                                                         | 3      | 2.3  | 24    | 18.8 | 43        | 33.6 | 44     | 34.4 | 14                     | 10.9 |
| <b>Odors (n=252)</b>                                          |        |      |       |      |           |      |        |      |                        |      |
| Technicians                                                   | 3      | 2.4  | 21    | 17.1 | 47        | 38.2 | 42     | 34.1 | 10                     | 8.1  |
| Other                                                         | 4      | 3.1  | 20    | 15.5 | 41        | 31.8 | 48     | 37.2 | 16                     | 12.4 |
| <b>Contact with chemicals or hazardous substances (n=252)</b> |        |      |       |      |           |      |        |      |                        |      |
| Technicians                                                   | 4      | 3.3  | 36    | 29.3 | 42        | 34.1 | 31     | 25.2 | 10                     | 8.1  |
| Other                                                         | 4      | 3.1  | 21    | 16.3 | 41        | 31.8 | 45     | 34.9 | 18                     | 14.0 |
| <b>Lifting / carrying heavy loads (n=253)</b>                 |        |      |       |      |           |      |        |      |                        |      |
| Technicians                                                   | 9      | 7.2  | 58    | 46.4 | 44        | 35.2 | 12     | 9.6  | 2                      | 1.6  |

|                                                                             |    |      |    |      |    |      |    |      |    |      |
|-----------------------------------------------------------------------------|----|------|----|------|----|------|----|------|----|------|
| Other                                                                       | 7  | 5.5  | 32 | 25.0 | 42 | 32.8 | 39 | 30.5 | 8  | 6.3  |
| <b>Transport of aids (e. g. PPE, tools) over long distances (n=253)</b>     |    |      |    |      |    |      |    |      |    |      |
| Technicians                                                                 | 30 | 24.0 | 44 | 35.2 | 28 | 22.4 | 20 | 16.0 | 3  | 2.4  |
| Other                                                                       | 14 | 10.9 | 32 | 25.0 | 45 | 35.2 | 23 | 18.0 | 14 | 10.9 |
| <b>Working with twisted upper body/forward flexion of the spine (n=254)</b> |    |      |    |      |    |      |    |      |    |      |
| Technicians                                                                 | 5  | 4.0  | 57 | 45.6 | 42 | 33.6 | 18 | 14.4 | 3  | 2.4  |
| Other                                                                       | 4  | 3.1  | 25 | 19.4 | 47 | 36.4 | 33 | 25.6 | 20 | 15.5 |
| <b>Working with unsupported raised arms (overhead work) (n=254)</b>         |    |      |    |      |    |      |    |      |    |      |
| Technicians                                                                 | 1  | 0.8  | 30 | 24.0 | 61 | 48.8 | 29 | 23.2 | 4  | 3.2  |
| Other                                                                       | 0  | 0.0  | 14 | 10.9 | 46 | 35.7 | 41 | 31.8 | 28 | 21.7 |
| <b>Reduced visibility (n=252)</b>                                           |    |      |    |      |    |      |    |      |    |      |
| Technicians                                                                 | 0  | 0.0  | 17 | 13.8 | 55 | 44.7 | 39 | 31.7 | 12 | 9.8  |
| Other                                                                       | 0  | 0.0  | 21 | 16.3 | 40 | 31.0 | 44 | 34.1 | 24 | 18.6 |
| <b>Closed/cramped quarters (n=253)</b>                                      |    |      |    |      |    |      |    |      |    |      |
| Technicians                                                                 | 10 | 8.0  | 44 | 35.2 | 52 | 41.6 | 14 | 11.2 | 5  | 4.0  |
| Other                                                                       | 4  | 3.1  | 36 | 28.1 | 43 | 33.6 | 33 | 25.8 | 12 | 9.4  |
| <b>Climbing (n=254)</b>                                                     |    |      |    |      |    |      |    |      |    |      |
| Technicians                                                                 | 34 | 27.2 | 61 | 48.8 | 23 | 18.4 | 6  | 4.8  | 1  | 0.8  |
| Other                                                                       | 20 | 15.5 | 47 | 36.4 | 29 | 22.5 | 20 | 15.5 | 13 | 10.1 |
| <b>Poor air quality / air conditioning (n=253)</b>                          |    |      |    |      |    |      |    |      |    |      |
| Technicians                                                                 | 13 | 10.4 | 39 | 31.2 | 30 | 24.0 | 36 | 28.8 | 7  | 5.6  |
| Other                                                                       | 17 | 13.3 | 29 | 22.7 | 42 | 32.8 | 30 | 23.4 | 10 | 7.8  |
| <b>Restricted movement (n=254)</b>                                          |    |      |    |      |    |      |    |      |    |      |
| Technicians                                                                 | 4  | 3.2  | 31 | 24.8 | 44 | 35.2 | 33 | 26.4 | 13 | 10.4 |
| Other                                                                       | 7  | 5.4  | 34 | 26.4 | 42 | 32.6 | 27 | 20.9 | 19 | 14.7 |
| <b>Unpredictable waiting times (e.g. during "weather days") (n=254)</b>     |    |      |    |      |    |      |    |      |    |      |
| Technicians                                                                 | 4  | 3.2  | 46 | 36.8 | 54 | 43.2 | 20 | 16.0 | 1  | 0.8  |
| Other                                                                       | 2  | 1.6  | 46 | 35.7 | 57 | 44.2 | 19 | 14.7 | 5  | 3.9  |

Table A2. Physical strains by phase of the wind farm.

[illegible]

|                                                                             |    |      |    |      |    |      |    |      |     |      |
|-----------------------------------------------------------------------------|----|------|----|------|----|------|----|------|-----|------|
| Under construction                                                          | 17 | 19.3 | 28 | 31.8 | 24 | 27.3 | 15 | 17.0 | 4   | 4.5  |
| In operation                                                                | 27 | 16.5 | 48 | 29.3 | 48 | 29.3 | 28 | 17.1 | 13  | 7.9  |
| <b>Working with twisted upper body/forward flexion of the spine (n=253)</b> |    |      |    |      |    |      |    |      |     |      |
| Under construction                                                          | 3  | 3.4  | 37 | 41.6 | 25 | 28.1 | 18 | 20.2 | 6   | 6.7  |
| In operation                                                                | 6  | 3.7  | 45 | 27.4 | 63 | 38.4 | 33 | 20.1 | 17  | 10.4 |
| <b>Working with unsupported raised arms (overhead work) (n=253)</b>         |    |      |    |      |    |      |    |      |     |      |
| Under construction                                                          | 1  | 1.1  | 19 | 21.3 | 35 | 39.3 | 27 | 30.3 | 7   | 7.9  |
| In operation                                                                | 0  | 0.0  | 25 | 15.2 | 71 | 43.3 | 43 | 26.2 | 25  | 15.2 |
| <b>Reduced visibility (n=251)</b>                                           |    |      |    |      |    |      |    |      |     |      |
| Under construction                                                          | 0  | 0.0  | 17 | 19.3 | 41 | 46.6 | 24 | 27.3 | 6   | 6.8  |
| In operation                                                                | 0  | 0.0  | 21 | 12.9 | 53 | 32.5 | 59 | 36.2 | 30  | 18.4 |
| <b>Closed/cramped quarters (n=252)</b>                                      |    |      |    |      |    |      |    |      |     |      |
| Under construction                                                          | 6  | 6.7  | 35 | 39.3 | 29 | 32.6 | 19 | 21.3 | 0   | 0.0  |
| In operation                                                                | 8  | 4.9  | 45 | 27.6 | 65 | 39.9 | 28 | 17.2 | 17  | 10.4 |
| <b>Climbing (n=253)</b>                                                     |    |      |    |      |    |      |    |      |     |      |
| Under construction                                                          | 25 | 28.1 | 41 | 46.1 | 16 | 18.0 | 5  | 5.6  | 2   | 2.2  |
| In operation                                                                | 28 | 17.1 | 67 | 40.9 | 36 | 22.0 | 21 | 12.8 | 112 | 7.3  |
| <b>Poor air quality / air conditioning (n=252)</b>                          |    |      |    |      |    |      |    |      |     |      |
| Under construction                                                          | 6  | 6.8  | 22 | 25.0 | 25 | 28.4 | 28 | 31.8 | 7   | 8.0  |
| In operation                                                                | 24 | 14.6 | 46 | 28.0 | 46 | 28.0 | 38 | 23.2 | 10  | 6.1  |
| <b>Restricted movement (n=253)</b>                                          |    |      |    |      |    |      |    |      |     |      |
| Under construction                                                          | 2  | 2.2  | 26 | 29.2 | 31 | 34.8 | 23 | 25.8 | 7   | 7.9  |
| In operation                                                                | 9  | 5.5  | 39 | 23.8 | 54 | 32.9 | 37 | 22.6 | 25  | 15.2 |
| <b>Unpredictable waiting times (e.g. during "weather days") (n=253)</b>     |    |      |    |      |    |      |    |      |     |      |
| Under construction                                                          | 2  | 2.2  | 41 | 46.1 | 39 | 43.8 | 6  | 6.7  | 1   | 1.1  |
| In operation                                                                | 4  | 2.4  | 51 | 31.1 | 71 | 43.3 | 33 | 20.1 | 5   | 3.0  |
