# Supplementary material
Source: HighWire-hosted journal article supplement (https://bmjopen.bmj.com/content/8/3/e020157)
Supplement: inline-supplementary-material-2 [file inline-supplementary-material-2.pdf]

## Project "BestOff"

### Subproject "Physical demands and psychological strains in the offshore wind industry"

#### Questionnaire

About you.

To begin, we require some personal information.

1. **Sex**

- ☐ male  
☐ female

2. **How old are you? (in years)**

- |                          |                          |                          |                          |                          |                          |                          |                          |                          |
|--------------------------|--------------------------|--------------------------|--------------------------|--------------------------|--------------------------|--------------------------|--------------------------|--------------------------|
| 19 or<br>younger         | 20 - 24                  | 25 - 29                  | 30 - 34                  | 35 - 39                  | 40 - 44                  | 45 - 49                  | 50 - 54                  | 55 and<br>older          |
| <input type="checkbox"/> | <input type="checkbox"/> | <input type="checkbox"/> | <input type="checkbox"/> | <input type="checkbox"/> | <input type="checkbox"/> | <input type="checkbox"/> | <input type="checkbox"/> | <input type="checkbox"/> |

3. **Which is your nationality? (If you have more than one, please write only one)**

4. **Which of the following best describes your family status?**

- ☐ single  
☐ in a relationship – living in a shared household  
☐ in a relationship – living in separate households

5. **Are children less than 18 years of age living in your household?**

- ☐ yes  
☐ no

Your offshore occupation.

The following questions refer to your current offshore occupation. If you have not worked offshore recently, then please refer to your last offshore occupation.

6. **How long have you been working in the offshore wind industry?**

- ☐ less than 1 year  
☐ 1 – 3 years  
☐ more than 3 years

7. **How long ago was your last offshore assignment?**

- ☐ I am currently offshore  
☐ less than 1 month  
☐ 1 – 3 months  
☐ 4 – 6 months  
☐ 7 – 12 months  
☐ more than 12 months

**8. Which of the following best describes your offshore occupation?**

- ☐ management onshore (back office)
- ☐ supervisor (offshore in executive position, e. g. side manager, platform master, ...)
- ☐ technician / maintenance
- ☐ catering / room service
- ☐ ship's crew member
- ☐ research personnel / surveyor
- ☐ medical / paramedical personnel
- ☐ other (please specify)

**9. Which of the following best describes your current employment status?**

- ☐ employed by an operator company
- ☐ employed by a sub-contractor
- ☐ temporary agency worker
- ☐ self-employed / freelancer

**10. In which phase is the offshore windpark on which you are currently working?**

- ☐ in construction
- ☐ in operation

**11. Do you have a regular offshore schedule (e.g. every 14 days)?**

- ☐ 7 days offshore – 7 days onshore
- ☐ 14 days offshore – 14 days onshore (or 15 days offshore – 13 days onshore)
- ☐ 21 days offshore – 21 days onshore
- ☐ no regular schedule, only occasional assignments
- ☐ other regular schedule (please specify)

**12. How long have you been working on this schedule?**

- ☐ less than 2 months
- ☐ 2 – 6 months
- ☐ 7 – 12 months
- ☐ more than 12 months

**13. In the last year, how often did you work offshore?**

- ☐ not at all
- ☐ 1 – 5 times
- ☐ 6 – 10 times
- ☐ more than 10 times

**14. In the last year, approximately how many days in total did you work offshore?**

**15. What kind of shifts do you work offshore?**

- ☐ only day shifts
- ☐ only night shifts
- ☐ rotating (day / night)

**16. Where do you live during your offshore assignments?**

- ☐ offshore – on a platform (accommodation platform / substation platform / converter platform)
- ☐ offshore – on a construction ship (e. g. jack up vessel)
- ☐ offshore on a hotel ship
- ☐ offshore – in a container on a platform
- ☐ on an island – at a hotel or flat
- ☐ on the mainland – at a hotel or flat

**17. In what kind of cabin / room do you live during your offshore assignments?**

- ☐ single cabin / room
- ☐ double cabin / room

**18. Before working in the offshore wind industry, had you already taken on work assignments that involved long periods of absence from your home?**

- ☐ yes
- ☐ no

**19. What mode of transportation do you usually take between your offshore accommodation and your offshore workplace?**

- ☐ ship / boat
- ☐ helicopter
- ☐ both
- ☐ no transfer needed, accommodation and workplace are at the same location

**Working conditions offshore.**

**The following questions refer to your working conditions offshore.**

**Examples of different stressors typical for the offshore workplace are listed below. Please indicate how often you are exposed to each of them. (Please give one answer per item)**

|                                                                | always                   | often                    | someti<br>mes            | rarely                   | never /<br>hardly<br>ever |
|----------------------------------------------------------------|--------------------------|--------------------------|--------------------------|--------------------------|---------------------------|
| noise                                                          | <input type="checkbox"/> | <input type="checkbox"/> | <input type="checkbox"/> | <input type="checkbox"/> | <input type="checkbox"/>  |
| vibrations / oscillation                                       | <input type="checkbox"/> | <input type="checkbox"/> | <input type="checkbox"/> | <input type="checkbox"/> | <input type="checkbox"/>  |
| humidity / moisture                                            | <input type="checkbox"/> | <input type="checkbox"/> | <input type="checkbox"/> | <input type="checkbox"/> | <input type="checkbox"/>  |
| cold                                                           | <input type="checkbox"/> | <input type="checkbox"/> | <input type="checkbox"/> | <input type="checkbox"/> | <input type="checkbox"/>  |
| heat                                                           | <input type="checkbox"/> | <input type="checkbox"/> | <input type="checkbox"/> | <input type="checkbox"/> | <input type="checkbox"/>  |
| frequent changes between heat and cold                         | <input type="checkbox"/> | <input type="checkbox"/> | <input type="checkbox"/> | <input type="checkbox"/> | <input type="checkbox"/>  |
| odours                                                         | <input type="checkbox"/> | <input type="checkbox"/> | <input type="checkbox"/> | <input type="checkbox"/> | <input type="checkbox"/>  |
| contact with chemicals or hazardous substances                 | <input type="checkbox"/> | <input type="checkbox"/> | <input type="checkbox"/> | <input type="checkbox"/> | <input type="checkbox"/>  |
| lifting / carrying heavy loads                                 | <input type="checkbox"/> | <input type="checkbox"/> | <input type="checkbox"/> | <input type="checkbox"/> | <input type="checkbox"/>  |
| transport of aids (e. g. PPE, tools) over long distances       | <input type="checkbox"/> | <input type="checkbox"/> | <input type="checkbox"/> | <input type="checkbox"/> | <input type="checkbox"/>  |
| working with twisted upper body / forward flexion of the spine | <input type="checkbox"/> | <input type="checkbox"/> | <input type="checkbox"/> | <input type="checkbox"/> | <input type="checkbox"/>  |
| working with unsupported raised arms (overhead work)           | <input type="checkbox"/> | <input type="checkbox"/> | <input type="checkbox"/> | <input type="checkbox"/> | <input type="checkbox"/>  |
| reduced visibility                                             | <input type="checkbox"/> | <input type="checkbox"/> | <input type="checkbox"/> | <input type="checkbox"/> | <input type="checkbox"/>  |
| closed / cramped quarters                                      | <input type="checkbox"/> | <input type="checkbox"/> | <input type="checkbox"/> | <input type="checkbox"/> | <input type="checkbox"/>  |
| climbing                                                       | <input type="checkbox"/> | <input type="checkbox"/> | <input type="checkbox"/> | <input type="checkbox"/> | <input type="checkbox"/>  |
| poor air quality / air conditioning                            | <input type="checkbox"/> | <input type="checkbox"/> | <input type="checkbox"/> | <input type="checkbox"/> | <input type="checkbox"/>  |
| restricted movement                                            | <input type="checkbox"/> | <input type="checkbox"/> | <input type="checkbox"/> | <input type="checkbox"/> | <input type="checkbox"/>  |
| unpredictable waiting times (e.g. during "weather days")       | <input type="checkbox"/> | <input type="checkbox"/> | <input type="checkbox"/> | <input type="checkbox"/> | <input type="checkbox"/>  |
